# Supplementary material
Source: Springer Nature journal article supplement (https://www.springermedizin.de/resource/supplementary/13054_2010_8691_MOESM4_ESM.pdf/9732802)

# Benchmark groups

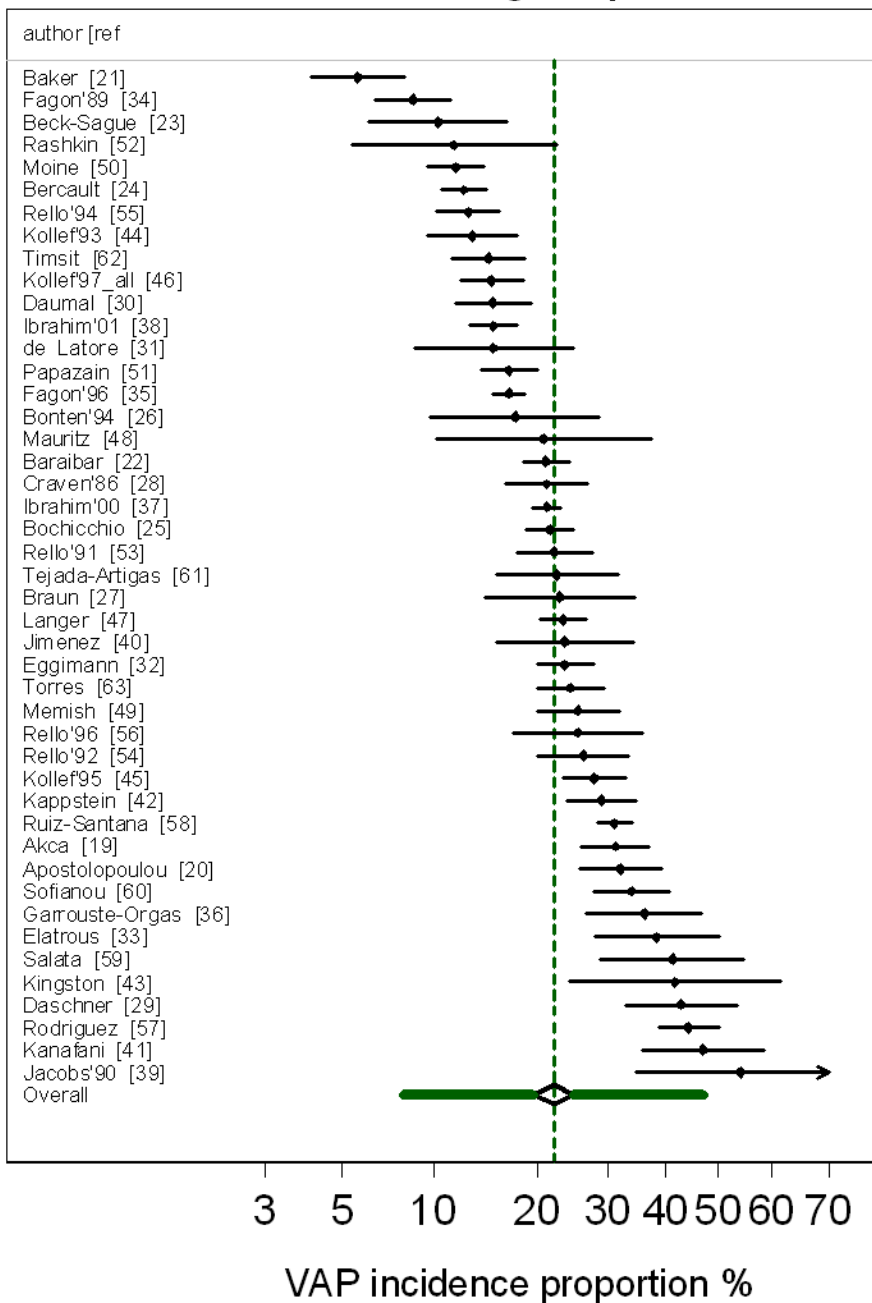

Supplement: MOESM4 [file 9732802]
